# Supplementary material for: Ageing-induced shrinkage of intervessel pit membranes in xylem of Clematis vitalba modifies its mechanical properties as revealed by atomic force microscopy
Source: Front Plant Sci. 2023 Jan 23;14:1002711. doi: 10.3389/fpls.2023.1002711 (PMC9899931; doi:10.3389/fpls.2023.1002711)
Supplement: Supplementary file 4 [file Table_4.docx]

Carmesin et al.—Frontiers in Plant Science 2022—Appendix S4

**Appendix 4.** Measured and calculated mechanical parameters for fresh and rehydrated (rehydr.) intervessel pit membranes of Clematis vitalba: Effective stiffness modulus Eeffective, apparent elastic moduls Eapparent, aspiration pressure Pb. Green colour: normal distributed values. Red colour: not normal distributed. -: sample size too small for normal distribution test. SD: Standard deviation. SD was used for normal distributed data. For not normal distributed data, the range (min and max) was given.

| **Age** | **Treatment** | **Effective stiffness modulus *E*effective SD or range in N/m3** | | **Apparent elastic modulus *E* SD or range in MPa** | | ***P*b in MPa** | | **Sample size *n*** |
| --- | --- | --- | --- | --- | --- | --- | --- | --- |
| **Value** | **Pshapiro-wilk** | **Value** | **Pshapiro-wilk** | **Value** | **Pshapiro-wilk** |  |
| 0 | Fresh | 0.340.18 | 0.1375 | 5732 | 0.417 | 2.201.28 | 0.7937 | 23 |
| 0 | Rehydr. | 0.46 0.08 | - | 27964 | - | 0.280.38 | - | 2 |
| 1 | Fresh | 0.440.24 | 0.4451 | 84  (3-278) | 0.01891 | 1.461.15 | 0.1021 | 18 |
| 1 | Rehydr. | 0.6331 | - | 440200 | - | 3.370.17 | - | 2 |
| 4 | Fresh | 0.350.33 | 0.4567 | 190165 | 0.3272 | 0.230.24 | 0.4109 | 4 |
| 4 | Rehydr. | 0.7028-0.73) | 0.0232 | 330130 | 0.4622 | 0.410.16 | 0.1641 | 4 |
